# Supplementary material for: Molecular Mechanisms of MmpL3 Function and Inhibition
Source: PubMed Central journal article supplement (PMC10171966; doi:10.1089/mdr.2021.0424), 2023-05-04

a.

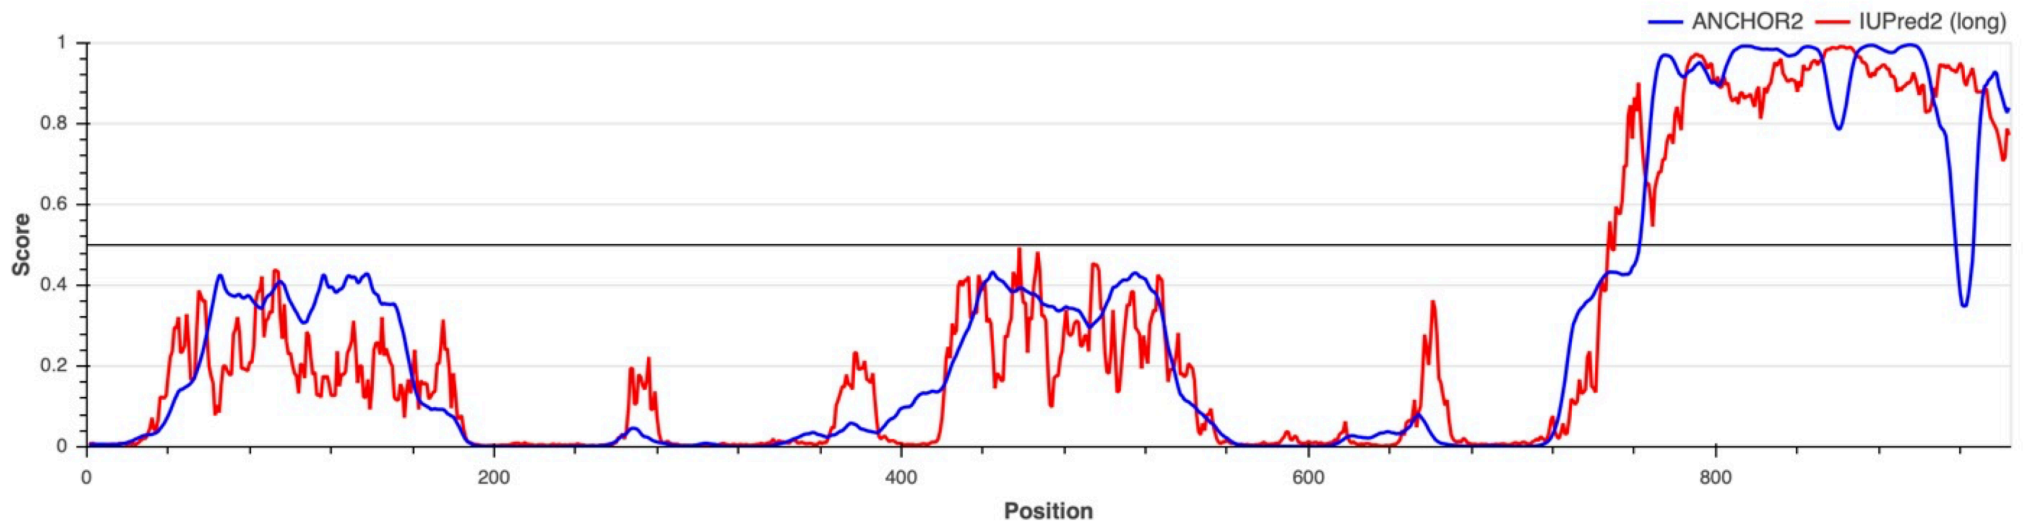

b.

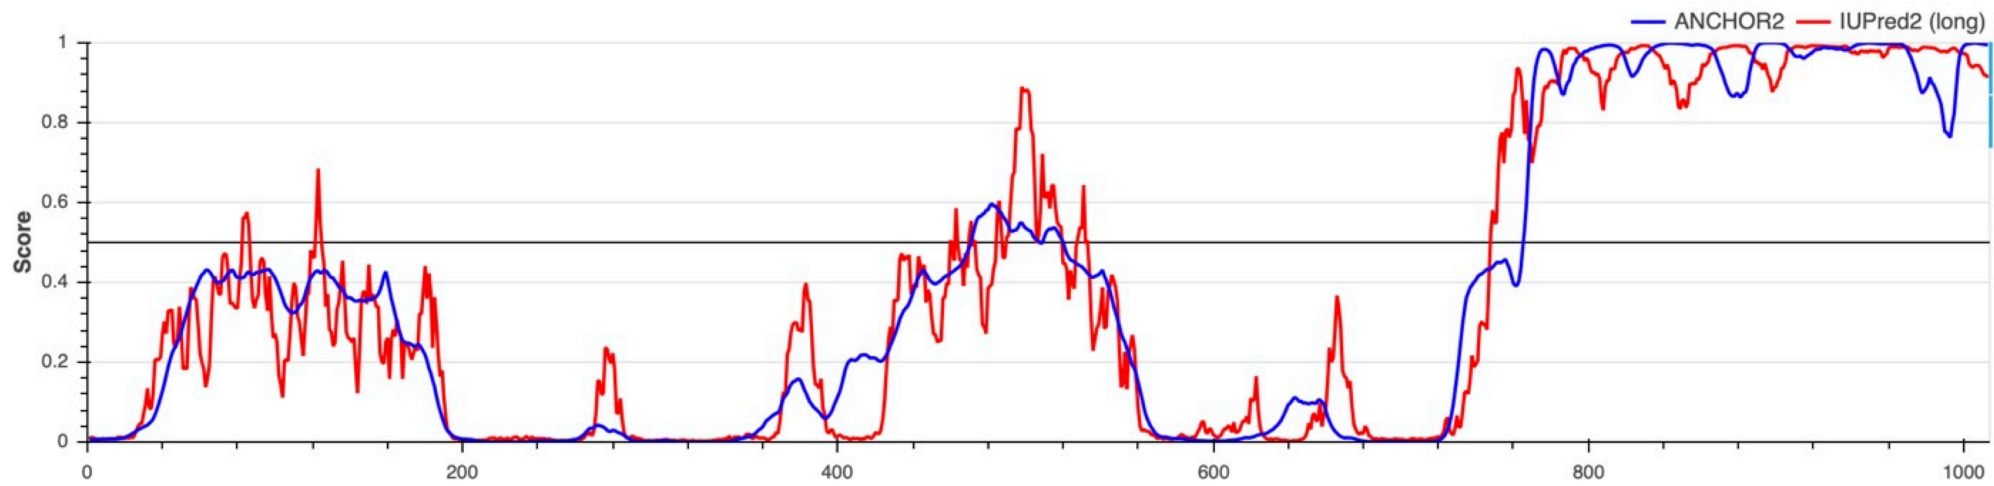

Supplement: Suppl_FigS1.pdf [file Suppl_FigS1.pdf]
