# Supplementary material for: Molecular Mechanisms of MmpL3 Function and Inhibition
Source: PubMed Central journal article supplement (PMC10171966; doi:10.1089/mdr.2021.0424), 2023-05-04
Supplement: Suppl_TableS1.pdf [file Suppl_TableS1.pdf]

| Evidence            | SQ109 | TBL-140 | HC2178 | E11 | E1 | AU1235 | HC2169 | HC2138 | P1 | CCI7967 | BM212 | Rimonabant | THPP-1 | NITD | ICA-2 | BMC/EJMCh | HC2099 | HC2183 | A1 | HC2184 | CRS400143<br>CRS400226 | HC2091 | HC2060 | HC2149 | HC2134 | GSK | PIPD-1 | Spiro | DA-5 | C215 | SIMBL | DA-8 | HC2032 | Q1 | GSK2623870A | GSK2043267A |   |   |  |
|---------------------|-------|---------|--------|-----|----|--------|--------|--------|----|---------|-------|------------|--------|------|-------|-----------|--------|--------|----|--------|------------------------|--------|--------|--------|--------|-----|--------|-------|------|------|-------|------|--------|----|-------------|-------------|---|---|--|
| Resistant Mutants   | +     | +       | +      | +   | +  | +      | +      | +      | +  | +       | +     | +          | +      | +    | +     | +         | +      | +      | +  | +      | +                      | +      | +      | +      | +      | +   | +      | +     | +    | +    | +     | +    | +      | +  | +           | +           | + |   |  |
| TMM/TDM Experiments | +     | +       | +      | +   |    | +      | +      | +      |    |         | +     | +          | +      | +    | +     | +         | +      | +      |    | +      | +                      | +      | +      | +      | +      |     | +      | +     | +    | +    | +     | +    | +      | +  | +           | +           | + |   |  |
| Spheroplast Assay   | -     |         |        | +   |    | +      |        |        |    |         | +     |            | +      | +    |       |           | +      | +      |    | +      |                        |        |        |        |        |     | +      |       |      |      | +     |      |        |    |             |             |   |   |  |
| NORTH Probe Assay   | +     |         | +      |     |    | +      | +      | +      |    |         | +     |            |        | +    |       |           | +      | +      |    | +      |                        |        | +      | +      | +      | +   |        |       |      |      | +     |      |        |    |             |             |   |   |  |
| SPR or BLI          | +     |         |        |     |    | +      |        |        |    |         |       |            | +      | +    |       |           |        |        |    |        |                        |        |        |        |        |     |        |       |      |      |       |      |        |    |             |             |   |   |  |
| Co-Crystals         | +     |         |        |     |    | +      |        |        |    |         |       | +          |        | +    |       |           |        |        |    |        |                        |        |        |        |        |     |        | +     |      |      |       |      |        |    |             |             |   |   |  |
| PMF Disruption      | +     | +       | +      | +   |    | -      | -      | +      |    |         | +     | +          | +      | -    |       |           | -      | -      |    | +      |                        | -      | -      | +      | -      |     |        |       |      | +    | +     | +    | +      | +  | +           | +           | + | + |  |

Supplemental Table 1
